# Supplementary figures and images for: SBOannotator: a Python Tool for the Automated Assignment of Systems Biology Ontology Terms
Source: Preprints.org preprint supplement (doi:10.20944/preprints202302.0317.v1), 2023-02-20

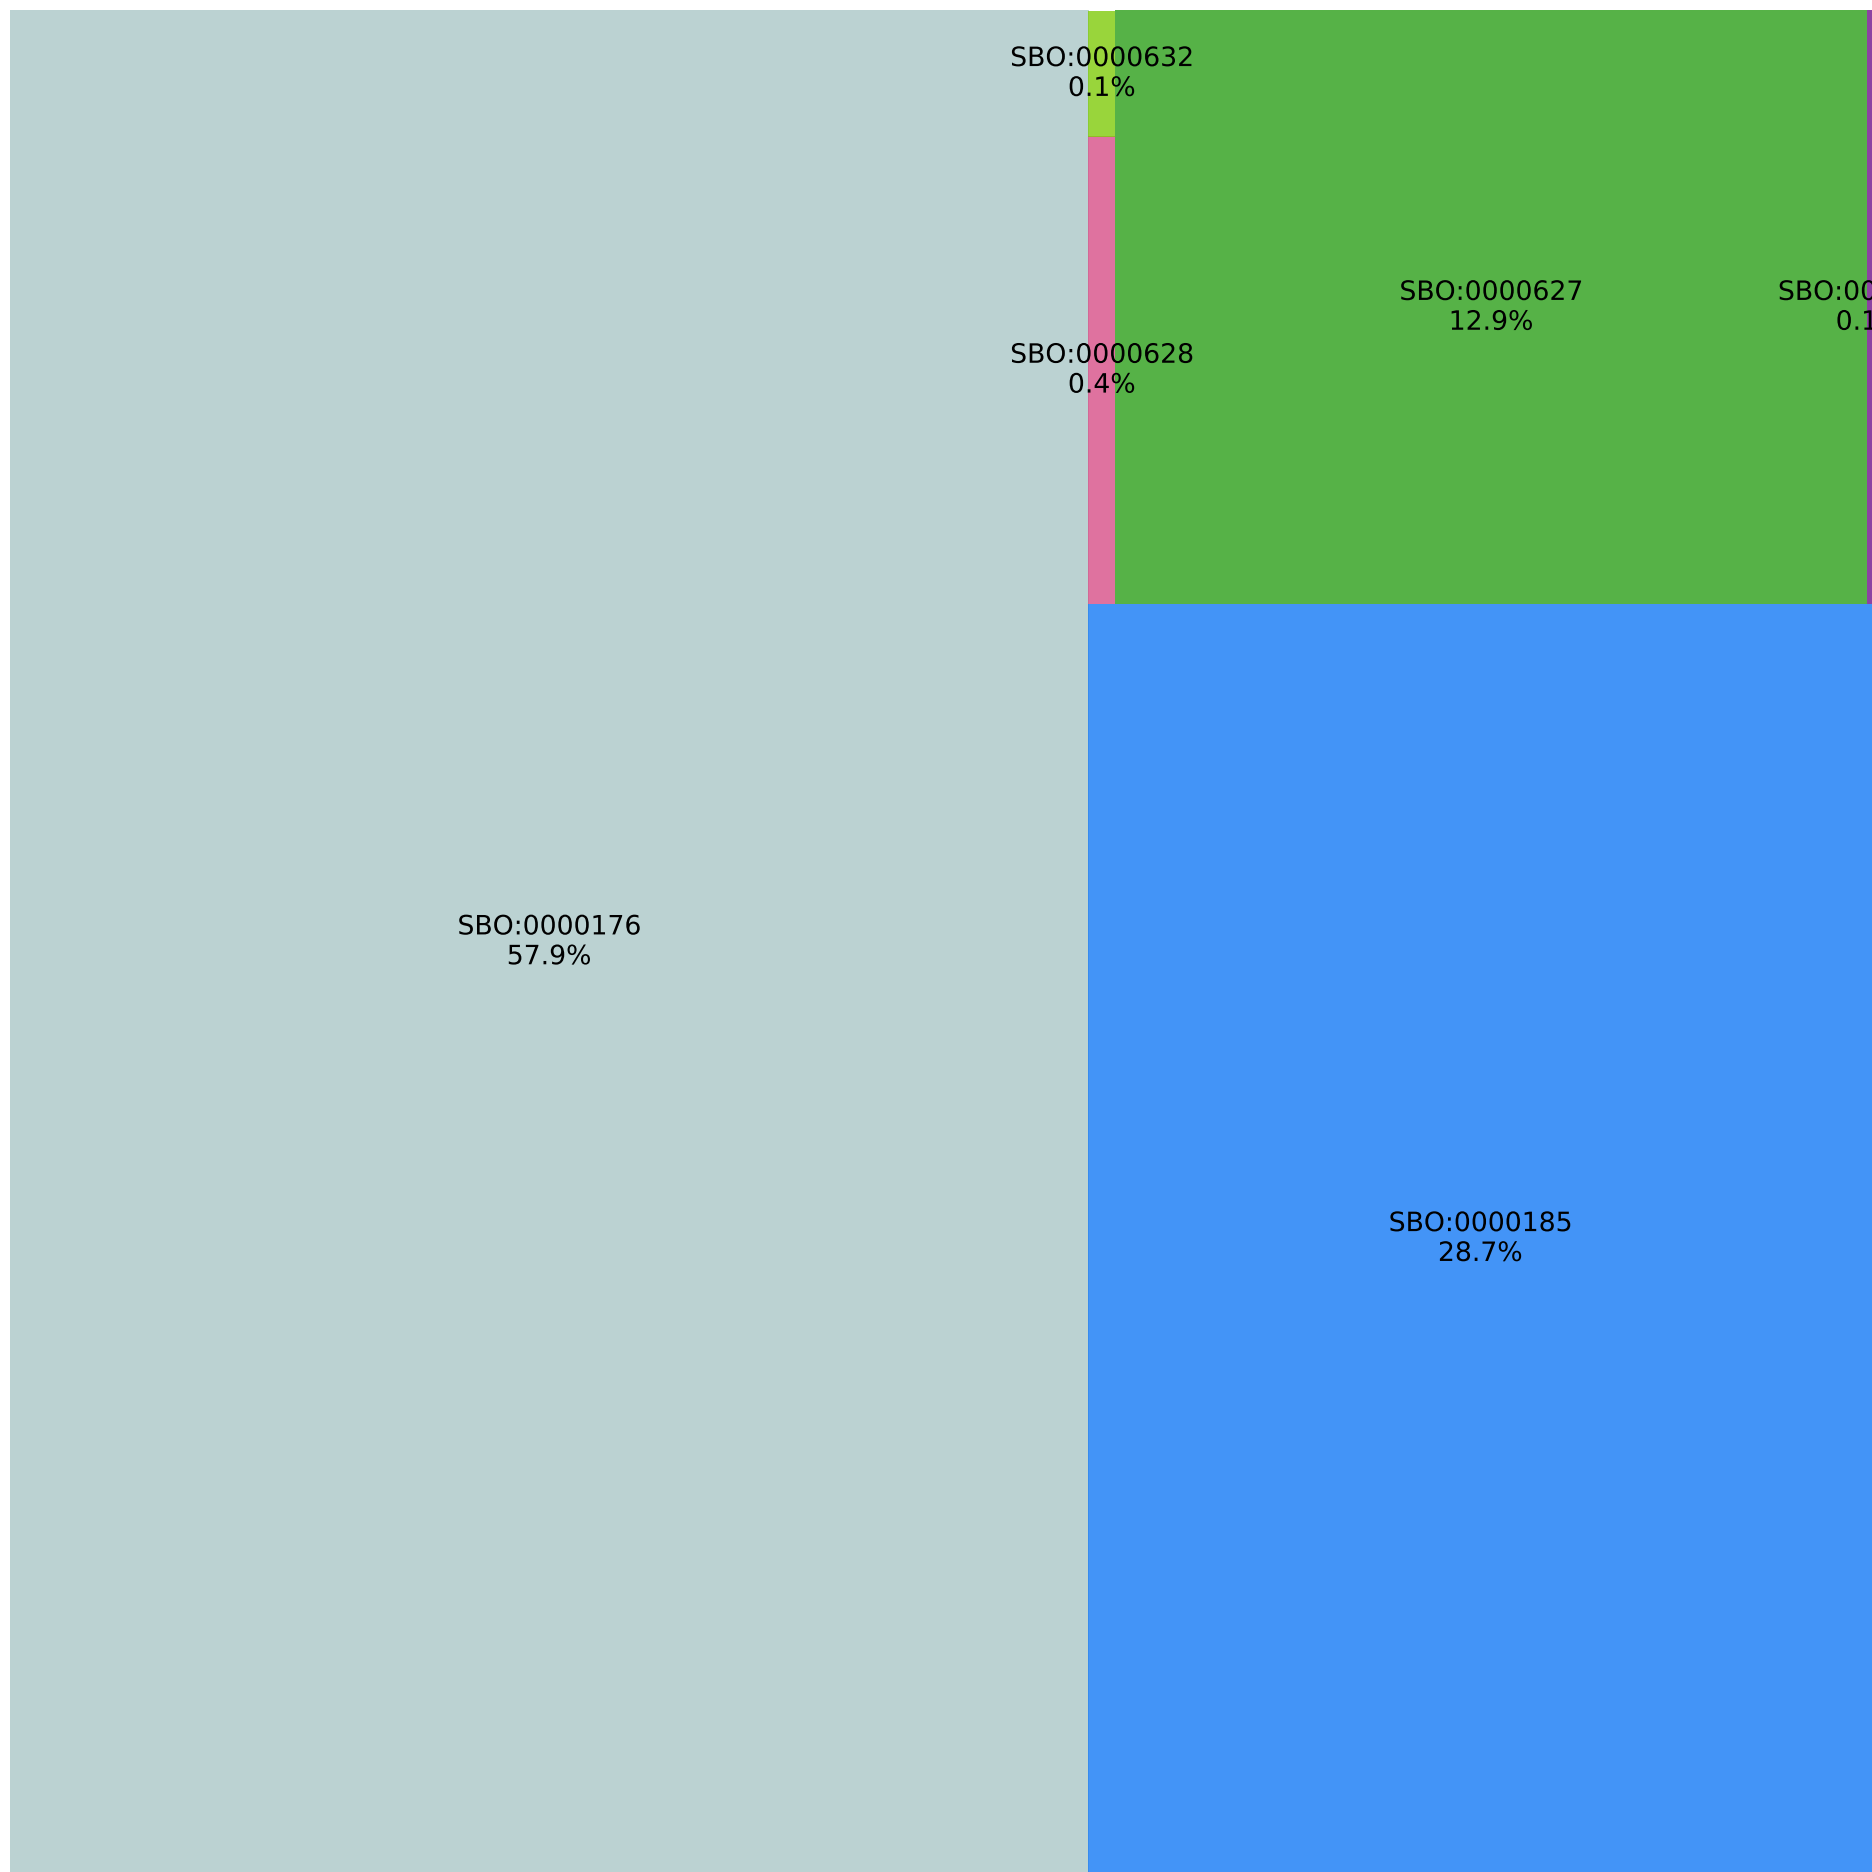

Supplement: Supplementary file 1 [file supplementary]

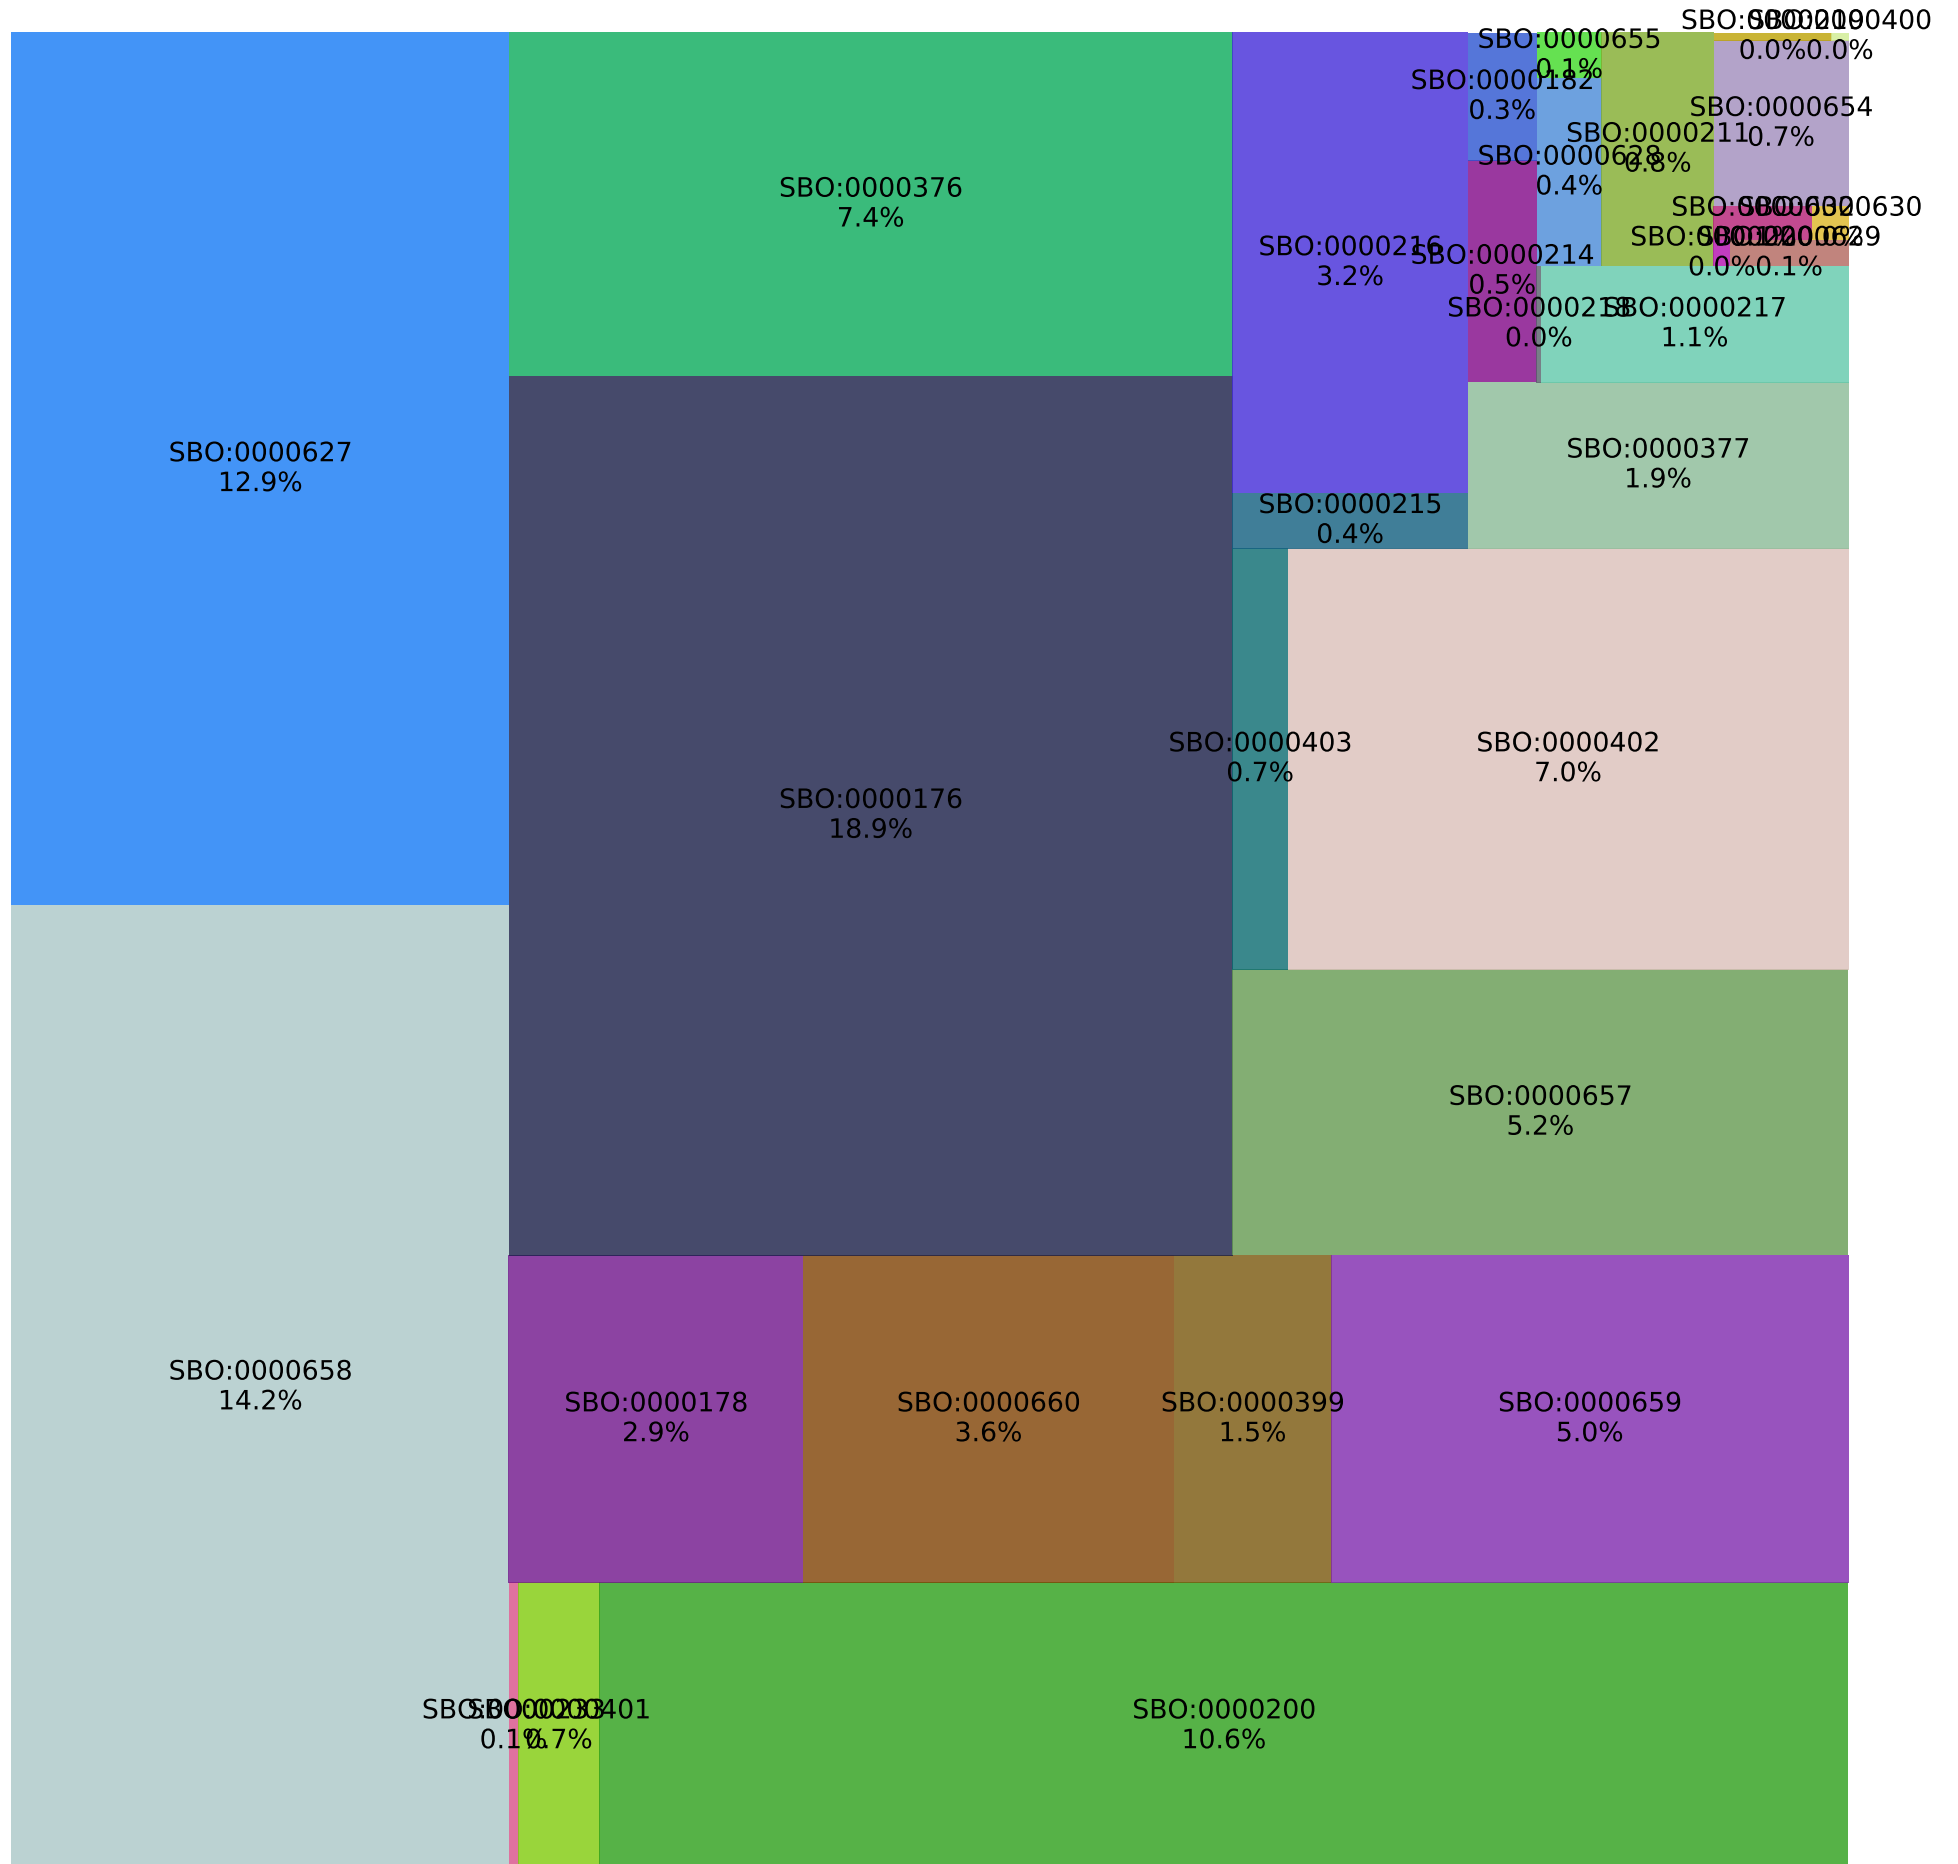

Supplement: Supplementary file 2 [file supplementary]
